# Supplementary material for: Combining ability, heritability and genotypic relations of different physiological traits in cacao hybrids
Source: PubMed Central journal article supplement (PMC5476260; doi:10.1371/journal.pone.0178790), 2017-06-19
Supplement: pone.0178790.s002.pdf [file pone.0178790.s002.pdf]

1 **S2 Appendix** - Mean values for gas exchange parameters of the 15 progenies of cacao.

| <b>MEDIUM VALUES</b>   |           |             |          |             |            |             |            |              |             |              |
|------------------------|-----------|-------------|----------|-------------|------------|-------------|------------|--------------|-------------|--------------|
| <b>PROGENIES</b>       | $P_N$     | $gs$        | $ci$     | $E$         | $Vpd_L$    | $WUE$       | $iWUE$     | $gs/Vpd_L$   | $Ci/Ca$     | $A/Ci$       |
| <b>SCA 6 x SJ02</b>    | 4.0a      | 0.09a       | 306a     | 0.82a       | 1.0f       | 5.3b        | 54.2c      | 0.09a        | 0.76a       | 0.01e        |
| <b>IMC67 x PUCALA</b>  | 2.9b      | 0.06b       | 298a     | 0.53b       | 1.1e       | 6.8a        | 59.5c      | 0.06b        | 0.74a       | 0.01e        |
| <b>SCA 6 x IMC 67</b>  | 2.8c      | 0.06c       | 287b     | 0.48b       | 1.0f       | 6.2a        | 58.4c      | 0.06c        | 0.72a       | 0.01e        |
| <b>IMC67 x SCA 24</b>  | 3.3b      | 0.05c       | 275c     | 0.5b        | 1.1e       | 6.6a        | 67.8c      | 0.05c        | 0.68b       | 0.01e        |
| <b>SCA 6 x PUCALA</b>  | 2.6d      | 0.04d       | 278c     | 0.48b       | 1.1e       | 5.9b        | 71.9b      | 0.04d        | 0.69b       | 0.01e        |
| <b>IMC 67 x SJ 02</b>  | 3.0b      | 0.04d       | 265c     | 0.54b       | 1.1e       | 7.2a        | 86.6b      | 0.04d        | 0.67b       | 0.01e        |
| <b>SCA 6 x SCA 24</b>  | 3.0b      | 0.05c       | 285b     | 0.51b       | 1.1e       | 6.5a        | 66.1c      | 0.05c        | 0.72a       | 0.01e        |
| <b>IMC 67 x P4B</b>    | 2.4d      | 0.03e       | 268c     | 0.34c       | 1.1d       | 8.3a        | 85.0b      | 0.03e        | 0.68b       | 0.01e        |
| <b>P4B x PUCALA</b>    | 2.2d      | 0.02f       | 96.8f    | 0.5b        | 2.1b       | 5.0b        | 137a       | 0.01g        | 0.37e       | 0.02c        |
| <b>P4B x SJ 02</b>     | 3.2b      | 0.04d       | 113e     | 0.81a       | 2.1b       | 5.3b        | 136a       | 0.02f        | 0.43d       | 0.03b        |
| <b>PUCALA x SJ 02</b>  | 3.2b      | 0.05d       | 135d     | 0.87a       | 2.1b       | 3.9c        | 75.6b      | 0.02f        | 0.51c       | 0.03c        |
| <b>SJ 02 x SCA 24</b>  | 2.8c      | 0.04d       | 134d     | 0.91a       | 2.0c       | 3.2c        | 73.5b      | 0.02f        | 0.52c       | 0.02d        |
| <b>P4B x SCA 24</b>    | 2.6d      | 0.03e       | 91.5f    | 0.52b       | 2.2a       | 6.1a        | 117a       | 0.01g        | 0.36e       | 0.04a        |
| <b>PUCALA x SCA 24</b> | 2.7c      | 0.05d       | 141d     | 0.89a       | 2.1c       | 3.5c        | 66.2c      | 0.02f        | 0.54c       | 0.02d        |
| <b>SCA 6 x P4B</b>     | 2.5d      | 0.02f       | 76.8g    | 0.49b       | 2.2a       | 5.7b        | 106a       | 0.01g        | 0.30f       | 0.04b        |
| <b>General mean</b>    | 2.9       | 0.05        | 203.2    | 0.61        | 1.54       | 5.7         | 84.1       | 0.036        | 0.58        | 0.02         |
| <b>Range</b>           | 1.0 ~ 5.6 | 0.02 ~ 0.10 | 60 ~ 313 | 0.31 ~ 1.07 | 0.98 ~ 2.2 | 3.002 ~ 9.3 | 48.6 ~ 181 | 0.01 ~ 0.098 | 0.23 ~ 0.79 | 0.007 ~ 0.06 |
| <b>C.V. (%)</b>        | 7.9       | 4.6         | 4.5      | 6.3         | 1.7        | 8.30        | 7.4        | 4.5          | 5.1         | 5.40         |

2 Means followed by different letters in the same column represent statistically significant differences (Scott-Knott, 5%).

3 Net photosynthetic rate ( $P_N$ ) [ $\mu\text{mol}(\text{CO}_2) \text{ m}^{-2} \text{ s}^{-1}$ ], stomatal conductance ( $gs$ ) [ $\text{mol}(\text{H}_2\text{O}) \text{ m}^{-2} \text{ s}^{-1}$ ], intercellular  $\text{CO}_2$  concentrations ( $C_i$ ) [ $\mu\text{mol}(\text{CO}_2) \text{ mol}^{-1}$ ],  
 4 transpiração ( $E$ ), Vapour Pressure Deficit ( $Vpd_L$ ) (kPa), instantaneous water-use efficiency ( $WUE = P_N/E$ ) [ $\mu\text{mol}(\text{CO}_2) \text{ mmol}^{-1}(\text{H}_2\text{O})$ ], intrinsic water use  
 5 efficiency ( $iWUE = P_N/gs$ ) [ $\mu\text{mol}(\text{CO}_2) \text{ mol}^{-1}(\text{H}_2\text{O})$ ], Ratio of intercellular and atmospheric  $\text{CO}_2$  molar fraction ( $C_i/C_a$ ), carboxylation efficiency ( $A/C_i$ ) ( $\text{mol}$   
 6  $\text{m}^{-2} \text{ s}^{-1}$ ). C.V = coefficient of variation, Range = Refers to the most contrasting plants among all progenies.
