# Supplementary material for: Combining ability, heritability and genotypic relations of different physiological traits in cacao hybrids
Source: PubMed Central journal article supplement (PMC5476260; doi:10.1371/journal.pone.0178790), 2017-06-19
Supplement: pone.0178790.s003.pdf [file pone.0178790.s003.pdf]

1

**S3 Appendix** - Mean values for chlorophyll fluorescence parameters of the 15 progenies of cacao.

| <b>MEDIUM VALUES</b>   |                  |                  |                  |                     |                     |                       |                     |
|------------------------|------------------|------------------|------------------|---------------------|---------------------|-----------------------|---------------------|
| <b>PROGÊNIES</b>       | <b><i>Fo</i></b> | <b><i>Fm</i></b> | <b><i>Fv</i></b> | <b><i>Fo/Fm</i></b> | <b><i>Fv/Fm</i></b> | <b><i>PI.Inst</i></b> | <b><i>Fv/Fo</i></b> |
| <b>SCA 6 x SJ02</b>    | 7443 c           | 41703c           | 34093b           | 0.18e               | 0.89a               | 1.74 c                | 4.59 a              |
| <b>IMC67 x PUCALA</b>  | 7696 b           | 42382b           | 34403a           | 0.18d               | 0.81a               | 2.15 a                | 4.48 b              |
| <b>SCA 6 x IMC 67</b>  | 7795 a           | 41786c           | 33811b           | 0.19c               | 0.81a               | 1.36 d                | 4.34 c              |
| <b>IMC67 x SCA 24</b>  | 7836 a           | 42834a           | 34948a           | 0.18d               | 0.82a               | 1.83 c                | 4.46 b              |
| <b>SCA 6 x PUCALA</b>  | 7551 c           | 41580c           | 33932b           | 0.18d               | 0.82a               | 1.20 d                | 4.51 b              |
| <b>IMC 67 x SJ 02</b>  | 76222 c          | 42040b           | 34716a           | 0.18d               | 0.83a               | 2.24 a                | 4.56 a              |
| <b>SCA 6 x SCA 24</b>  | 7547 c           | 41709c           | 33755b           | 0.18d               | 0.82a               | 1.62 c                | 4.47 b              |
| <b>IMC 67 x P4B</b>    | 7843 a           | 41622c           | 33653b           | 0.19b               | 0.81a               | 1.3 d                 | 4.29 c              |
| <b>P4B x PUCALA</b>    | 7318 d           | 38168g           | 31131e           | 0.19a               | 0.82a               | 1.60 c                | 4.27 c              |
| <b>P4B x SJ 02</b>     | 7538 c           | 38992f           | 31379e           | 0.19a               | 0.81a               | 1.67 c                | 4.18 d              |
| <b>PUCALA x SJ 02</b>  | 7573 c           | 40635d           | 33455b           | 0.19c               | 0.82a               | 1.35 d                | 4.43 b              |
| <b>SJ 02 x SCA 24</b>  | 7619 c           | 38905f           | 31811d           | 0.20a               | 0.82a               | 1.21 d                | 4.22 d              |
| <b>P4B x SCA 24</b>    | 7143 e           | 39160f           | 31746d           | 0.18d               | 0.81a               | 1.34 d                | 4.45 b              |
| <b>PUCALA x SCA 24</b> | 6971 f           | 39187f           | 32362c           | 0.18e               | 0.83a               | 1.96 b                | 4.66 a              |
| <b>SCA 6 x P4B</b>     | 7230 d           | 39704e           | 32601 c          | 0.18d               | 0.82a               | 1.04 d                | 4.52 b              |
| <b>General mean</b>    | 7515             | 40694            | 33186            | 0.19                | 0.82                | 1.57                  | 4.43                |
| <b>Range</b>           | 6921 ~ 7883      | 37395 ~ 43018    | 30693 ~ 35386    | 0.18 ~ 0.20         | 0.80 ~ 0.85         | 0.91 ~ 2.28           | 4.12 ~ 4.71         |
| <b>C.V. (%)</b>        | 1.2              | 0.9              | 1.2              | 1.4                 | 1.3                 | 9.80                  | 1.5                 |

2

Means followed by different letters in the same column represent statistically significant differences (Scott-Knott, 5%).

3

Initial chlorophyll fluorescence (*Fo*), maximal chlorophyll fluorescence (*Fm*), variable chlorophyll fluorescence (*Fm*–*Fo*) (*Fv*), maximal photochemical efficiency of PSII (*Fv/Fm*), maximum quantum quantum yield of PS2 photochemistry (*Fv/Fo*), quantum yield baseline (*Fo/Fm*) e o performance index ou plant vitality (*PI Inst*). C.V = coefficient of variation, Range = Refers to the most contrasting plants among all progenies.

4

5

6

7
