# Supplementary material for: Combining ability, heritability and genotypic relations of different physiological traits in cacao hybrids
Source: PubMed Central journal article supplement (PMC5476260; doi:10.1371/journal.pone.0178790), 2017-06-19
Supplement: pone.0178790.s004.pdf [file pone.0178790.s004.pdf]

**Supplementary table 4** - Mean values for mineral nutrient content of the 15 progenies of cacao.

| <b>Mean Values</b>            |                 |                 |                  |                 |                  |                  |                  |                  |                  |                  |
|-------------------------------|-----------------|-----------------|------------------|-----------------|------------------|------------------|------------------|------------------|------------------|------------------|
| <b>Progenies</b>              | <b><i>P</i></b> | <b><i>K</i></b> | <b><i>Na</i></b> | <b><i>N</i></b> | <b><i>Ca</i></b> | <b><i>Mg</i></b> | <b><i>Fe</i></b> | <b><i>Zn</i></b> | <b><i>Cu</i></b> | <b><i>Mn</i></b> |
| <b><i>SCA 6 x SJ02</i></b>    | 3.0b            | 20.3a           | 3.07a            | 19.6a           | 9.58a            | 8.10b            | 238c             | 95.7b            | 11.2a            | 1063b            |
| <b><i>IMC67 x PUCALA</i></b>  | 3.1b            | 20.7a           | 2.56b            | 18.9b           | 9.25a            | 8.30b            | 202c             | 108a             | 10.0a            | 737c             |
| <b><i>SCA 6 x IMC 67</i></b>  | 3.0b            | 22.6a           | 2.48b            | 20.9a           | 9.88a            | 8.43b            | 310c             | 105a             | 9.83a            | 1023b            |
| <b><i>IMC67 x SCA 24</i></b>  | 3.2b            | 22.0a           | 2.70a            | 19.8a           | 8.28a            | 7.10c            | 267c             | 117a             | 10.9a            | 1035b            |
| <b><i>SCA 6 x PUCALA</i></b>  | 3.2b            | 17.4b           | 2.53b            | 19.6a           | 9.43a            | 8.43b            | 245c             | 105a             | 11.2a            | 988b             |
| <b><i>IMC 67 x SJ 02</i></b>  | 3.4a            | 17.2b           | 2.73a            | 21.1a           | 8.93a            | 8.78a            | 273c             | 91.5b            | 11.6a            | 1054b            |
| <b><i>SCA 6 x SCA 24</i></b>  | 3.5a            | 18.0b           | 2.60b            | 20.5a           | 9.00a            | 8.58b            | 276c             | 97.3b            | 9.60a            | 1029b            |
| <b><i>IMC 67 x P4B</i></b>    | 3.7a            | 15.0b           | 2.26b            | 18.4b           | 9.68a            | 8.45b            | 221c             | 126a             | 10.5a            | 861c             |
| <b><i>P4B x PUCALA</i></b>    | 3.5a            | 14.1c           | 2.30b            | 20.7a           | 10.85a           | 9.00a            | 384b             | 111a             | 11.6a            | 1376a            |
| <b><i>P4B x SJ 02</i></b>     | 3.3b            | 12.0c           | 2.48b            | 20.3a           | 9.78a            | 9.48a            | 351b             | 105a             | 9.15a            | 1217a            |
| <b><i>PUCALA x SJ 02</i></b>  | 3.4a            | 12.3c           | 2.57b            | 21.4a           | 8.58a            | 9.00a            | 400b             | 101a             | 8.48a            | 1065b            |
| <b><i>SJ 02 x SCA 24</i></b>  | 3.0b            | 16.0b           | 2.83a            | 19.1b           | 9.50a            | 9.55a            | 398b             | 106a             | 8.28a            | 1221a            |
| <b><i>P4B x SCA 24</i></b>    | 3.0b            | 16.1b           | 2.89a            | 20.5a           | 9.73a            | 9.08a            | 495a             | 109a             | 11.4a            | 1265a            |
| <b><i>PUCALA x SCA 24</i></b> | 3.8a            | 15.8b           | 3.30a            | 21.3a           | 9.68a            | 8.60b            | 522a             | 92.9b            | 13.9a            | 804c             |
| <b><i>SCA 6 x P4B</i></b>     | 3.2b            | 9.88d           | 2.83a            | 16.1c           | 9.43a            | 9.15a            | 508a             | 86.3b            | 7.63a            | 620c             |
| <b>General mean</b>           | 3.3             | 16.6            | 2.7              | 19.9            | 9.4              | 8.7              | 339              | 105              | 10.4             | 1024             |
| <b>Range</b>                  | 2.6 ~ 4.2       | 6.8 ~ 29.4      | 1.8 ~ 3.8        | 15.7 ~ 23.4     | 7.49 ~ 11.6      | 6.23 ~ 10.3      | 144 ~ 708        | 77.3 ~ 175       | 4.47 ~ 15.2      | 591 ~ 1593       |
| <b>C.V. (%)</b>               | 10.7            | 6.1             | 5.9              | 6.7             | 4.1              | 5.86             | 10.3             | 10.0             | 10.1             | 21.35            |

25 Means followed by different letters in the same column represent statistically significant differences (Scott-Knott, 5%).  
 26 Phosphorus (*P*), potassium (*K*), sodium (*Na*), nitrogen (*N*), calcium (*Ca*), magnesium (*Mg*) (all in g kg<sup>-1</sup> DM), and iron (*Fe*), zinc (*Zn*), copper (*Cu*) e  
 27 manganese (*Mn*) (all in mg/kg<sup>-1</sup> DM). C.V = coefficient of variation, Range = Refers to the most contrasting plants among all progenies.  
 28
